# Supplementary material for: Compound defects and thermoelectric properties in ternary CuAgSe-based materials
Source: Royal Society of Chemistry journal article supplement (doi:10.1039/c5ta02721g), 2015-01-01
Supplement: c5ta02721g1.pdf [file c5ta02721g1.pdf]

## Supporting Information

### **Compound Defects and Thermoelectric Properties in Ternary**

### **CuAgSe-based Materials**

Xiaobei Wang,<sup>a,b,c</sup> Pengfei Qiu,<sup>a,b</sup> Tiansong Zhang,<sup>b</sup> Dudi Ren,<sup>a,b</sup> Lihua Wu,<sup>a,b,c</sup> Xun Shi,<sup>\*a,b</sup> Jihui Yang,<sup>\*d</sup> and Lidong Chen<sup>\*a,b,e</sup>

*<sup>a</sup>State Key Laboratory of High Performance Ceramics and Superfine Microstructure, Shanghai Institute of Ceramics, Chinese Academy of Sciences, Shanghai 200050, China. E-mail: xshi@mail.sic.ac.cn; cld@mail.sic.ac.cn*

*<sup>b</sup>CAS Key Laboratory of Materials for Energy Conversion, Shanghai Institute of Ceramics, Chinese Academy of Sciences, Shanghai 200050, China*

*<sup>c</sup>University of Chinese Academy of Sciences, 19 Yuquan Road, Beijing 100049, China*

*<sup>d</sup>Materials Science and Engineering Department, University of Washington, Seattle, Washington 98195-2120, USA. E-mail: jihuiy@uw.edu*

*<sup>e</sup>Shanghai Institute of Materials Genome, Shanghai 200050, China*

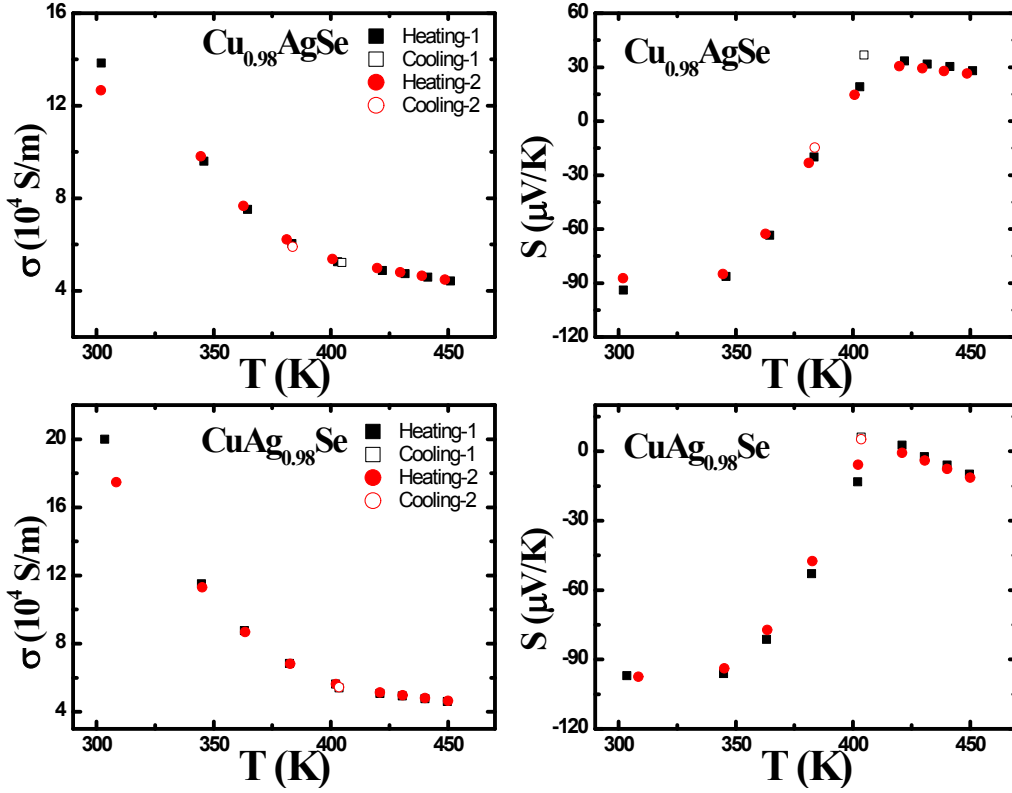

**Fig. S1** Cycle measurements of electrical conductivity  $\sigma$  and thermopower  $S$  from 300 K to 450 K for sample  $\text{Cu}_{0.98}\text{AgSe}$  and  $\text{CuAg}_{0.98}\text{Se}$ .

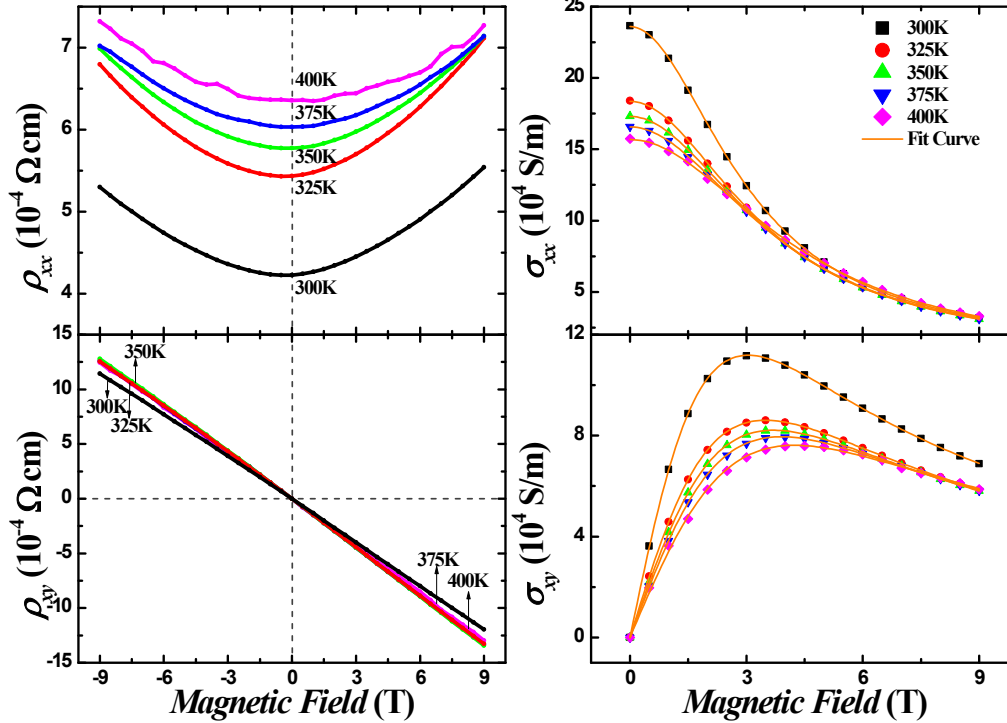

**Fig. S2** Magnetic field dependence of longitudinal electrical resistivity  $\rho_{xx}$  (a) and Hall resistivity  $\rho_{xy}$  (b) of  $\beta\text{-CuAgSe}$  from 300 K to 400 K, and the calculated longitudinal conductivity  $\sigma_{xx}$  (c) and Hall conductivity  $\sigma_{xy}$  (d). The solid lines in (c) and (d) are the fits using Equation (3) and (4).

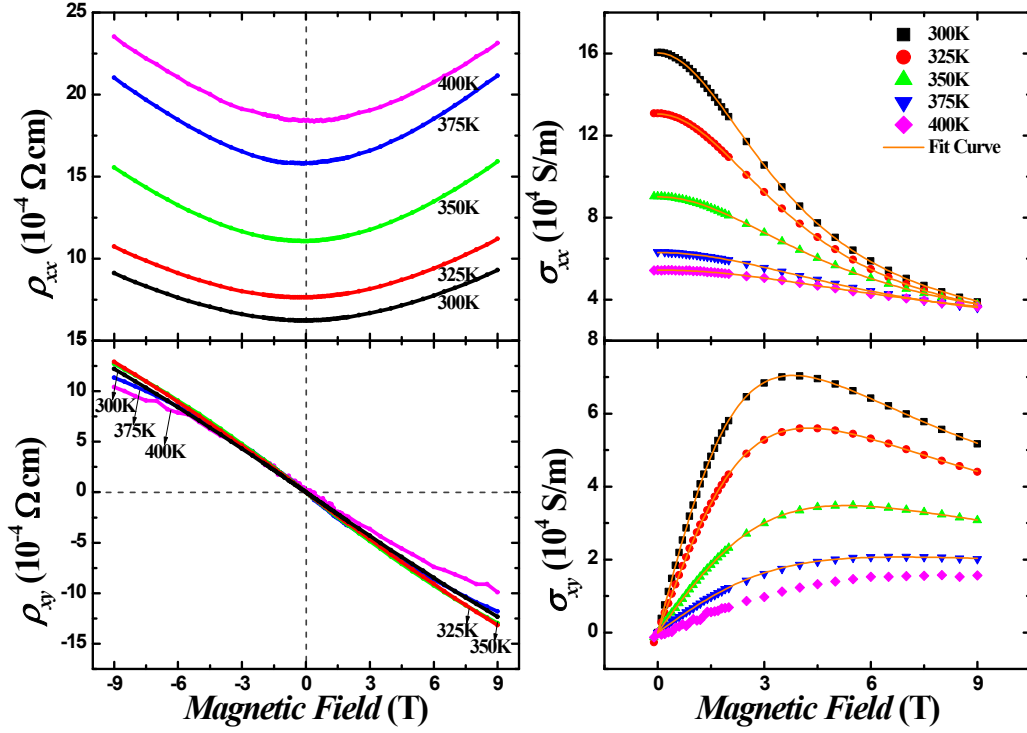

**Fig. S3** Magnetic field dependence of longitudinal electrical resistivity  $\rho_{xx}$  (a) and Hall resistivity  $\rho_{xy}$  (b) of  $\text{Cu}_{0.99}\text{AgSe}$  from 300 K to 400 K, and the calculated longitudinal conductivity  $\sigma_{xx}$  (c) and Hall conductivity  $\sigma_{xy}$  (d). The solid lines in (c) and (d) are the fits using Equation (3) and (4).

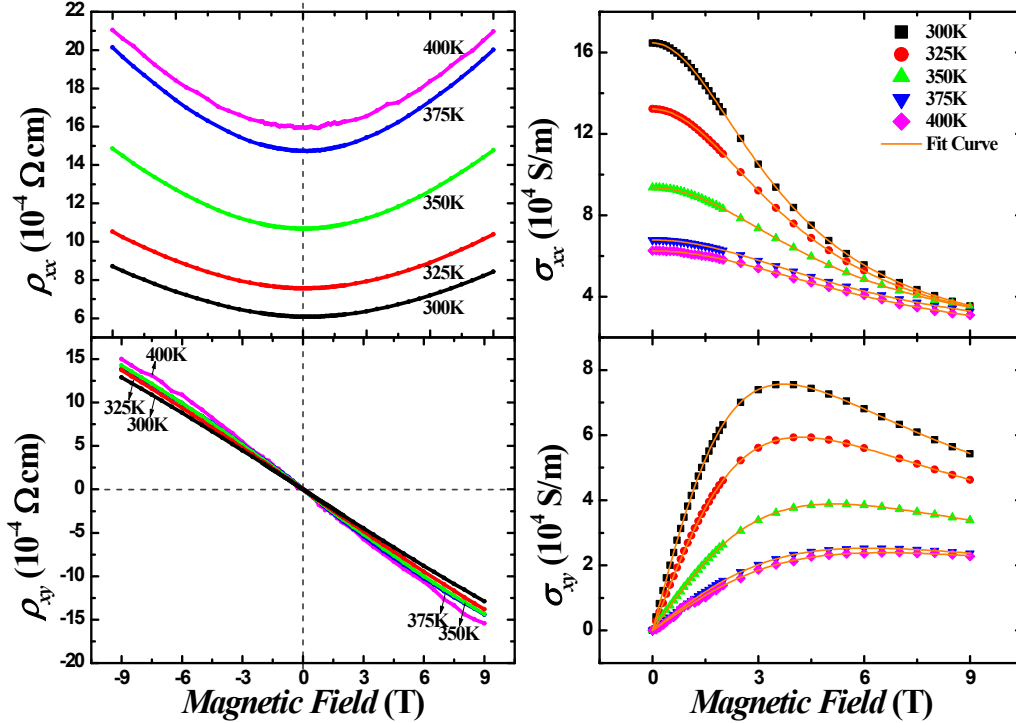

**Fig. S4** Magnetic field dependence of longitudinal electrical resistivity  $\rho_{xx}$  (a) and Hall resistivity  $\rho_{xy}$  (b) of  $\text{CuAg}_{0.99}\text{Se}$  from 300 K to 400 K, and the calculated longitudinal conductivity  $\sigma_{xx}$  (c) and Hall conductivity  $\sigma_{xy}$  (d). The solid lines in (c) and (d) are the fits using Equation (3) and (4).

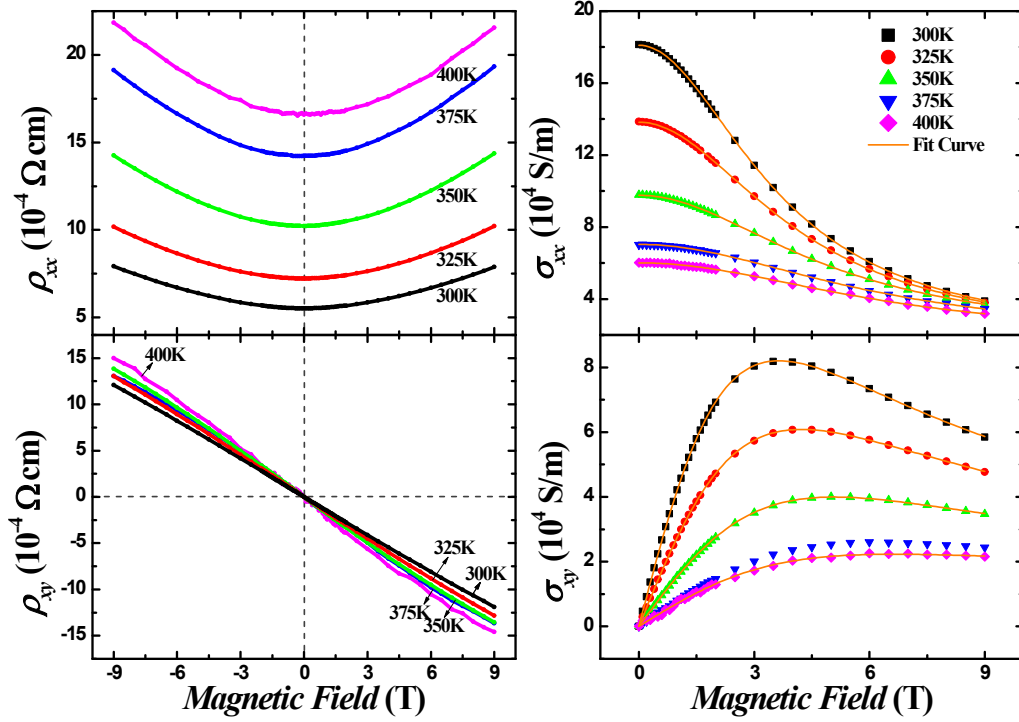

**Fig. S5** Magnetic field dependence of longitudinal electrical resistivity  $\rho_{xx}$  (a) and Hall resistivity  $\rho_{xy}$  (b) of  $\text{CuAg}_{0.98}\text{Se}$  from 300 K to 400 K, and the calculated longitudinal conductivity  $\sigma_{xx}$  (c) and Hall conductivity  $\sigma_{xy}$  (d). The solid lines in (c) and (d) are the fits using Equation (3) and (4).

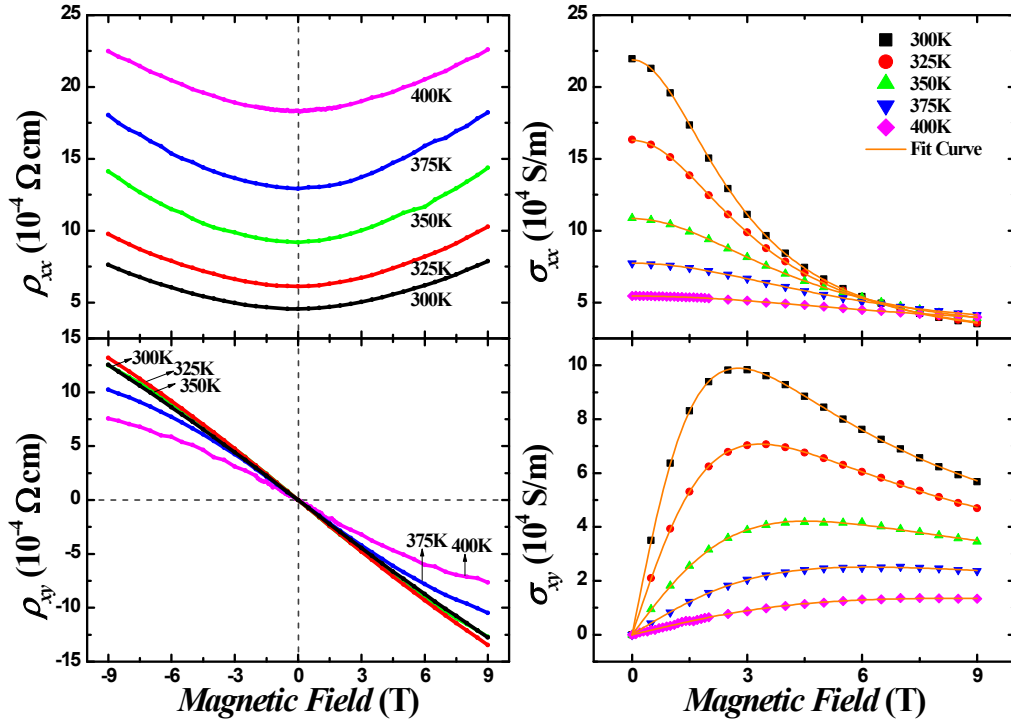

**Fig. S6** Magnetic field dependence of longitudinal electrical resistivity  $\rho_{xx}$  (a) and Hall resistivity  $\rho_{xy}$  (b) of  $\text{CuAgSe}_{1.04}$  from 300 K to 400 K, and the calculated longitudinal conductivity  $\sigma_{xx}$  (c) and Hall conductivity  $\sigma_{xy}$  (d). The solid lines in (c) and (d) are the fits by using Equation (3) and (4).

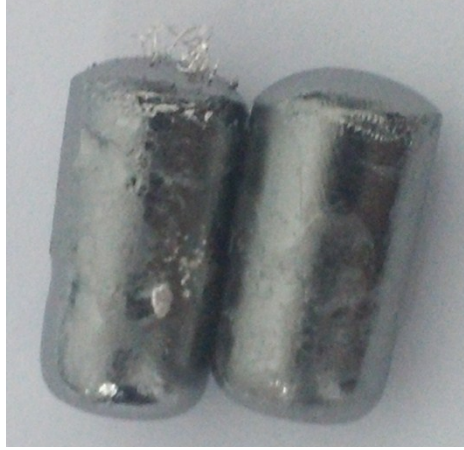

**Fig. S7** Ingot samples after high temperature annealing.  $\text{CuAg}_{1.01}\text{Se}$ ,  $\text{Cu}_{1.01}\text{AgSe}$ , and  $\text{CuAgSe}_{0.99}$  display the same phenomenon as the left sample with the metallic Ag on the surface. The samples in the Section of 3.1.1-3.1.4 are the right one without obvious metallic Ag observed.

**Table S1.** Fitting parameters for sample  $\beta\text{-CuAgSe}$ .

| T(K) | $n_{xx}(10^{18} \text{ cm}^{-3})$ | $\mu_{xx}(10^4 \text{ cm}^2/\text{V-s})$ | $C_{xx}(\Omega^{-1}\text{m}^{-1})$ | $n_{xy}(10^{18} \text{ cm}^{-3})$ | $\mu_{xy}(10^4 \text{ cm}^2/\text{V-s})$ | $C_{xy}(10^{-3})$ |
|------|-----------------------------------|------------------------------------------|------------------------------------|-----------------------------------|------------------------------------------|-------------------|
| 300  | 4.32                              | 0.33                                     | 8914.24                            | 4.21                              | 0.33                                     | 2.57              |
| 325  | 3.80                              | 0.29                                     | 8811.22                            | 3.72                              | 0.29                                     | 2.25              |
| 350  | 3.85                              | 0.27                                     | 6830.86                            | 3.76                              | 0.27                                     | 1.80              |
| 375  | 3.88                              | 0.26                                     | 6057.52                            | 3.84                              | 0.26                                     | 1.94              |
| 400  | 4.17                              | 0.23                                     | 3654.34                            | 3.99                              | 0.24                                     | 2.31              |

**Table S2.** Fitting parameters for sample  $\text{Cu}_{0.99}\text{AgSe}$ .

| T(K) | $n_{xx}(10^{18} \text{ cm}^{-3})$ | $\mu_{xx}(10^4 \text{ cm}^2/\text{V-s})$ | $C_{xx}(\Omega^{-1}\text{m}^{-1})$ | $n_{xy}(10^{18} \text{ cm}^{-3})$ | $\mu_{xy}(10^4 \text{ cm}^2/\text{V-s})$ | $C_{xy}(10^{-3})$ |
|------|-----------------------------------|------------------------------------------|------------------------------------|-----------------------------------|------------------------------------------|-------------------|
| 300  | 3.38                              | 0.26                                     | 17837.22                           | 3.25                              | 0.27                                     | 7.84              |
| 325  | 2.96                              | 0.24                                     | 17564.74                           | 2.87                              | 0.24                                     | 9.18              |
| 350  | 2.25                              | 0.19                                     | 20613.82                           | 2.15                              | 0.20                                     | 15.83             |
| 375  | 1.62                              | 0.16                                     | 22539.92                           | 1.17                              | 0.18                                     | 87.57             |

**Table S3.** Fitting parameters for sample  $\text{Cu}_{0.98}\text{AgSe}$ .

| T(K) | $n_{xx}(10^{18} \text{ cm}^{-3})$ | $\mu_{xx}(10^4 \text{ cm}^2/\text{V-s})$ | $C_{xx}(\Omega^{-1}\text{m}^{-1})$ | $n_{xy}(10^{18} \text{ cm}^{-3})$ | $\mu_{xy}(10^4 \text{ cm}^2/\text{V-s})$ | $C_{xy}(10^{-3})$ |
|------|-----------------------------------|------------------------------------------|------------------------------------|-----------------------------------|------------------------------------------|-------------------|
| 300  | 3.39                              | 0.24                                     | 17126.60                           | 3.27                              | 0.24                                     | 5.93              |
| 325  | 2.67                              | 0.20                                     | 18887.09                           | 2.55                              | 0.20                                     | 6.28              |
| 350  | 2.02                              | 0.17                                     | 20636.09                           | 1.86                              | 0.17                                     | 4.92              |
| 375  | 1.48                              | 0.14                                     | 22236.39                           | 1.22                              | 0.15                                     | 21.14             |
| 400  | 1.12                              | 0.12                                     | 24620.52                           | 0.80                              | 0.13                                     | 62.87             |

**Table S4.** Fitting parameters for sample CuAg<sub>0.99</sub>Se.

| T(K) | $n_{xx}(10^{18} \text{ cm}^{-3})$ | $\mu_{xx}(10^4 \text{ cm}^2/\text{V-s})$ | $C_{xx}(\Omega^{-1}\text{m}^{-1})$ | $n_{xy}(10^{18} \text{ cm}^{-3})$ | $\mu_{xy}(10^4 \text{ cm}^2/\text{V-s})$ | $C_{xy}(10^{-3})$ |
|------|-----------------------------------|------------------------------------------|------------------------------------|-----------------------------------|------------------------------------------|-------------------|
| 300  | 3.51                              | 0.27                                     | 13629.32                           | 3.44                              | 0.27                                     | 5.29              |
| 325  | 3.10                              | 0.24                                     | 13767.59                           | 3.04                              | 0.24                                     | 6.52              |
| 350  | 2.46                              | 0.20                                     | 16103.31                           | 2.39                              | 0.20                                     | 11.16             |
| 375  | 1.91                              | 0.17                                     | 17245.32                           | 1.77                              | 0.17                                     | 21.99             |
| 400  | 1.97                              | 0.15                                     | 14044.87                           | 1.68                              | 0.17                                     | 36.66             |

**Table S5.** Fitting parameters for sample CuAg<sub>0.98</sub>Se.

| T(K) | $n_{xx}(10^{18} \text{ cm}^{-3})$ | $\mu_{xx}(10^4 \text{ cm}^2/\text{V-s})$ | $C_{xx}(\Omega^{-1}\text{m}^{-1})$ | $n_{xy}(10^{18} \text{ cm}^{-3})$ | $\mu_{xy}(10^4 \text{ cm}^2/\text{V-s})$ | $C_{xy}(10^{-3})$ |
|------|-----------------------------------|------------------------------------------|------------------------------------|-----------------------------------|------------------------------------------|-------------------|
| 300  | 3.75                              | 0.27                                     | 16023.47                           | 3.63                              | 0.28                                     | 7.35              |
| 325  | 3.20                              | 0.24                                     | 16409.91                           | 3.09                              | 0.24                                     | 9.71              |
| 350  | 2.47                              | 0.20                                     | 18383.47                           | 2.37                              | 0.20                                     | 16.60             |
| 400  | 1.78                              | 0.15                                     | 16628.66                           | 1.37                              | 0.18                                     | 67.87             |

**Table S6.** Fitting parameters for sample CuAgSe<sub>1.04</sub>.

| T(K) | $n_{xx}(10^{18} \text{ cm}^{-3})$ | $\mu_{xx}(10^4 \text{ cm}^2/\text{V-s})$ | $C_{xx}(\Omega^{-1}\text{m}^{-1})$ | $n_{xy}(10^{18} \text{ cm}^{-3})$ | $\mu_{xy}(10^4 \text{ cm}^2/\text{V-s})$ | $C_{xy}(10^{-3})$ |
|------|-----------------------------------|------------------------------------------|------------------------------------|-----------------------------------|------------------------------------------|-------------------|
| 300  | 3.50                              | 0.36                                     | 17979.08                           | 3.38                              | 0.36                                     | 3.44              |
| 325  | 3.02                              | 0.30                                     | 18668.98                           | 2.89                              | 0.30                                     | 5.10              |
| 350  | 2.37                              | 0.23                                     | 22767.92                           | 2.24                              | 0.23                                     | 16.11             |
| 375  | 1.83                              | 0.17                                     | 26563.32                           | 1.56                              | 0.18                                     | 48.51             |
| 400  | 1.25                              | 0.13                                     | 28859.85                           | 1.15                              | 0.13                                     | 47.33             |
